# Supplementary material for: The use of phosphonates for constructing 3d–4f clusters at high oxidation states: synthesis and characterization of two unusual heterometallic CeMn complexes
Source: Royal Society of Chemistry journal article supplement (doi:10.1039/c002474k), 2010-01-01
Supplement: c002474k.pdf [file c002474k.pdf]

## Supporting Information

### The use of phosphonates for constructing 3d-4f clusters at high oxidation states: synthesis and characterization of two unusual heterometallic CeMn complexes

Mei Wang, Da-Qiang Yuan, Cheng-Bing Ma, Ming-Jian Yuan, Ming-Qiang Hu, Na Li, Hui Chen, Chang-Neng Chen\* and Qiu-Tian Liu

Table S1. Selected bond angles [°] for **1**

|             |           |             |           |             |            |
|-------------|-----------|-------------|-----------|-------------|------------|
| O5A-Ce1-O5B | 105.59(5) | O1B-Ce1-O2  | 59.22(6)  | O1-Mn1-O4   | 95.39(7)   |
| O5A-Ce1-O5  | 105.59(5) | O1-Ce1-O2   | 115.52(5) | O2B-Mn1-O4D | 175.45(7)  |
| O5B-Ce1-O5  | 105.59(5) | O3-Ce1-O2   | 105.05(4) | O2C-Mn1-O4D | 90.64(8)   |
| O5A-Ce1-O1A | 72.55(6)  | O5A-Ce1-O2B | 70.10(5)  | O1-Mn1-O4D  | 95.39(7)   |
| O5B-Ce1-O1A | 126.79(6) | O5B-Ce1-O2B | 171.93(6) | O4-Mn1-O4D  | 93.55(11)  |
| O5-Ce1-O1A  | 126.57(6) | O5-Ce1-O2B  | 69.89(5)  | O2B-Mn1-O7A | 90.98(7)   |
| O5A-Ce1-O1B | 126.57(6) | O1A-Ce1-O2B | 59.22(6)  | O2C-Mn1-O7A | 90.98(7)   |
| O5B-Ce1-O1B | 72.55(6)  | O1B-Ce1-O2B | 115.52(5) | O1-Mn1-O7A  | 175.84(10) |
| O5-Ce1-O1B  | 126.79(6) | O1-Ce1-O2B  | 59.27(6)  | O4-Mn1-O7A  | 87.45(7)   |
| O1A-Ce1-O1B | 68.57(6)  | O3-Ce1-O2B  | 105.05(4) | O4D-Mn1-O7A | 87.45(7)   |
| O5A-Ce1-O1  | 126.79(6) | O2-Ce1-O2B  | 113.51(3) | O2E-Mn2-O2A | 85.24(10)  |
| O5B-Ce1-O1  | 126.57(6) | O5A-Ce1-O2A | 171.93(6) | O2E-Mn2-O1  | 85.95(7)   |
| O5-Ce1-O1   | 72.55(6)  | O5B-Ce1-O2A | 69.89(5)  | O2A-Mn2-O1  | 85.95(7)   |
| O1A-Ce1-O1  | 68.57(6)  | O5-Ce1-O2A  | 70.10(5)  | O2E-Mn2-O6  | 175.28(7)  |
| O1B-Ce1-O1  | 68.57(6)  | O1A-Ce1-O2A | 115.52(5) | O2A-Mn2-O6  | 90.34(8)   |
| O5A-Ce1-O3  | 66.88(4)  | O1B-Ce1-O2A | 59.27(6)  | O1-Mn2-O6   | 95.43(7)   |
| O5B-Ce1-O3  | 66.88(4)  | O1-Ce1-O2A  | 59.22(6)  | O2E-Mn2-O6D | 90.34(8)   |
| O5-Ce1-O3   | 66.88(4)  | O3-Ce1-O2A  | 105.05(4) | O2A-Mn2-O6D | 175.28(7)  |
| O1A-Ce1-O3  | 139.43(4) | O2-Ce1-O2A  | 113.51(3) | O1-Mn2-O6D  | 95.43(7)   |
| O1B-Ce1-O3  | 139.43(4) | O2B-Ce1-O2A | 113.51(3) | O6-Mn2-O6D  | 94.02(11)  |
| O1-Ce1-O3   | 139.43(4) | O2B-Mn1-O2C | 85.12(10) | O2E-Mn2-O8  | 91.27(7)   |
| O5A-Ce1-O2  | 69.89(5)  | O2B-Mn1-O1  | 85.96(7)  | O2A-Mn2-O8  | 91.27(7)   |
| O5B-Ce1-O2  | 70.10(5)  | O2C-Mn1-O1  | 85.96(7)  | O1-Mn2-O8   | 176.21(10) |
| O5-Ce1-O2   | 171.93(6) | O2B-Mn1-O4  | 90.64(8)  | O6-Mn2-O8   | 87.14(7)   |
| O1A-Ce1-O2  | 59.27(6)  | O2C-Mn1-O4  | 175.45(7) | O6D-Mn2-O8  | 87.14(7)   |

<sup>a</sup>Symmetry transformations used to generate equivalent atoms:

A: -y+1,x-y+1,z; B: -x+y,-x+1,z; C: -x+y,-x+1,-z+1/2; D: x,y,-z+1/2; E: -y+1,x-y+1,-z+1/2

**Table S2.** Selected bond angles [°] for complex **2**

|             |          |             |          |                             |          |
|-------------|----------|-------------|----------|-----------------------------|----------|
| O2-Ce1-O3   | 73.1(3)  | O3-Ce5-O31  | 67.7(3)  | O18-Ce9-O66                 | 69.2(3)  |
| O2-Ce1-O5   | 73.7(2)  | O38-Ce5-O31 | 85.5(3)  | O20-Ce9-O66                 | 74.6(2)  |
| O3-Ce1-O5   | 140.5(2) | O9-Ce5-O31  | 134.6(2) | O5-Ce9-O66                  | 127.4(2) |
| O2-Ce1-O6   | 149.7(3) | O12-Ce5-O46 | 74.4(3)  | O27-Ce9-O66                 | 146.3(3) |
| O3-Ce1-O6   | 111.5(3) | O10-Ce5-O46 | 69.7(3)  | O72-Ce9-O64                 | 71.6(3)  |
| O5-Ce1-O6   | 108.0(3) | O3-Ce5-O46  | 127.8(3) | O23-Ce9-O64                 | 147.4(3) |
| O2-Ce1-O1   | 60.6(3)  | O38-Ce5-O46 | 144.2(3) | O17-Ce9-O64                 | 74.7(3)  |
| O3-Ce1-O1   | 72.7(2)  | O9-Ce5-O46  | 132.7(3) | O18-Ce9-O64                 | 68.7(3)  |
| O5-Ce1-O1   | 72.7(2)  | O31-Ce5-O46 | 75.5(3)  | O20-Ce9-O64                 | 132.1(3) |
| O6-Ce1-O1   | 149.6(3) | O12-Ce5-O42 | 132.7(3) | O5-Ce9-O64                  | 129.3(2) |
| O2-Ce1-O30  | 77.5(3)  | O10-Ce5-O42 | 69.9(3)  | O27-Ce9-O64                 | 74.9(2)  |
| O3-Ce1-O30  | 123.5(2) | O3-Ce5-O42  | 126.0(3) | O66-Ce9-O64                 | 102.8(3) |
| O5-Ce1-O30  | 68.0(2)  | O38-Ce5-O42 | 72.1(3)  | O22-Ce10-O28                | 91.3(4)  |
| O6-Ce1-O30  | 75.5(3)  | O9-Ce5-O42  | 72.3(3)  | O22-Ce10-O25                | 81.1(3)  |
| O1-Ce1-O30  | 128.8(2) | O31-Ce5-O42 | 142.6(3) | O28-Ce10-O25                | 77.3(3)  |
| O2-Ce1-O31  | 77.1(3)  | O46-Ce5-O42 | 105.8(3) | O22-Ce10-O73                | 89.5(4)  |
| O3-Ce1-O31  | 68.1(3)  | O12-Ce5-O68 | 142.6(3) | O28-Ce10-O73                | 76.0(3)  |
| O5-Ce1-O31  | 123.4(2) | O10-Ce5-O68 | 106.4(3) | O25-Ce10-O73                | 151.4(4) |
| O6-Ce1-O31  | 77.3(3)  | O3-Ce5-O68  | 134.1(3) | O22-Ce10-O74                | 116.8(4) |
| O1-Ce1-O31  | 128.8(3) | O38-Ce5-O68 | 78.2(3)  | O28-Ce10-O74                | 134.5(2) |
| O30-Ce1-O31 | 58.9(3)  | O9-Ce5-O68  | 138.2(3) | O25-Ce10-O74                | 138.4(2) |
| O2-Ce1-O23  | 127.6(2) | O31-Ce5-O68 | 79.8(3)  | O73-Ce10-O74                | 69.7(3)  |
| O3-Ce1-O23  | 121.5(3) | O46-Ce5-O68 | 68.9(3)  | O22-Ce10-O75                | 67.6(3)  |
| O5-Ce1-O23  | 66.4(2)  | O42-Ce5-O68 | 66.8(4)  | O28-Ce10-O75                | 135.9(3) |
| O6-Ce1-O23  | 77.0(3)  | O13-Ce6-O4  | 66.8(3)  | O25-Ce10-O75                | 132.0(4) |
| O1-Ce1-O23  | 75.7(2)  | O13-Ce6-O16 | 74.0(3)  | O73-Ce10-O75                | 66.1(4)  |
| O30-Ce1-O23 | 114.7(2) | O4-Ce6-O16  | 67.2(2)  | O74-Ce10-O75                | 49.2(4)  |
| O31-Ce1-O23 | 154.3(2) | O13-Ce6-O14 | 65.5(3)  | O77 <sup>-</sup> -Ce11-O37  | 76.7(6)  |
| O2-Ce1-O21  | 128.5(3) | O4-Ce6-O14  | 119.5(3) | O77 <sup>-</sup> -Ce11-O35  | 96.7(6)  |
| O3-Ce1-O21  | 67.3(2)  | O16-Ce6-O14 | 65.5(3)  | O37-Ce11-O35                | 103.6(3) |
| O5-Ce1-O21  | 121.4(2) | O13-Ce6-O29 | 135.1(3) | O77 <sup>-</sup> -Ce11-O32  | 161.1(6) |
| O6-Ce1-O21  | 77.6(3)  | O4-Ce6-O29  | 69.0(2)  | O37-Ce11-O32                | 85.7(4)  |
| O1-Ce1-O21  | 76.8(2)  | O16-Ce6-O29 | 82.2(2)  | O35-Ce11-O32                | 80.6(3)  |
| O30-Ce1-O21 | 153.1(2) | O14-Ce6-O29 | 135.4(3) | O77 <sup>-</sup> -Ce11-O78  | 61.7(7)  |
| O31-Ce1-O21 | 114.8(2) | O13-Ce6-O26 | 84.2(3)  | O37-Ce11-O78                | 138.3(4) |
| O23-Ce1-O21 | 58.2(2)  | O4-Ce6-O26  | 68.0(2)  | O35-Ce11-O78                | 85.4(3)  |
| O2-Ce2-O5   | 73.1(2)  | O16-Ce6-O26 | 135.0(3) | O32-Ce11-O78                | 136.0(4) |
| O2-Ce2-O4   | 72.6(2)  | O14-Ce6-O26 | 137.9(3) | O77 <sup>-</sup> -Ce11-O76A | 108.1(7) |
| O5-Ce2-O4   | 140.3(2) | O29-Ce6-O26 | 86.6(3)  | O37-Ce11-O76A               | 78.0(4)  |
| O2-Ce2-O8   | 151.8(3) | O13-Ce6-O56 | 75.5(3)  | O35-Ce11-O76A               | 154.7(3) |
| O5-Ce2-O8   | 110.7(2) | O4-Ce6-O56  | 128.9(3) | O32-Ce11-O76A               | 74.3(3)  |
| O4-Ce2-O8   | 109.0(3) | O16-Ce6-O56 | 133.0(3) | O78-Ce11-O76A               | 110.5(3) |
| O2-Ce2-O1   | 60.4(3)  | O14-Ce6-O56 | 69.5(3)  | O77 <sup>-</sup> -Ce11-O78A | 72.4(6)  |
| O5-Ce2-O1   | 72.1(2)  | O29-Ce6-O56 | 143.0(3) | O37-Ce11-O78A               | 100.7(4) |
| O4-Ce2-O1   | 74.0(2)  | O26-Ce6-O56 | 75.2(3)  | O35-Ce11-O78A               | 150.3(3) |
| O8-Ce2-O1   | 147.8(3) | O13-Ce6-O54 | 131.6(3) | O32-Ce11-O78A               | 118.4(4) |
| O2-Ce2-O27  | 126.6(3) | O4-Ce6-O54  | 127.9(3) | O78-Ce11-O78A               | 65.0(4)  |
| O5-Ce2-O27  | 67.8(2)  | O16-Ce6-O54 | 73.4(3)  | O76A-Ce11-O78A              | 48.5(3)  |
| O4-Ce2-O27  | 120.6(2) | O14-Ce6-O54 | 68.7(3)  | O77-Ce12-O32                | 86.8(6)  |
| O8-Ce2-O27  | 77.9(3)  | O29-Ce6-O54 | 73.2(2)  | O77-Ce12-O78                | 94.3(7)  |
| O1-Ce2-O27  | 73.7(2)  | O26-Ce6-O54 | 143.2(3) | O32-Ce12-O78                | 164.9(3) |
| O2-Ce2-O33  | 80.5(3)  | O56-Ce6-O54 | 102.8(3) | O77-Ce12-O35                | 108.1(6) |
| O5-Ce2-O33  | 68.6(2)  | O13-Ce6-O69 | 142.6(3) | O32-Ce12-O35                | 80.9(3)  |
| O4-Ce2-O33  | 123.6(2) | O4-Ce6-O69  | 129.9(3) | O78-Ce12-O35                | 84.4(3)  |
| O8-Ce2-O33  | 75.6(2)  | O16-Ce6-O69 | 140.8(3) | O77-Ce12-O76A               | 100.9(7) |
| O1-Ce2-O33  | 130.8(2) | O14-Ce6-O69 | 110.6(3) | O32-Ce12-O76A               | 78.4(3)  |
| O27-Ce2-O33 | 115.3(2) | O29-Ce6-O69 | 75.6(3)  | O78-Ce12-O76A               | 116.0(3) |
| O2-Ce2-O34  | 78.4(3)  | O26-Ce6-O69 | 75.8(3)  | O35-Ce12-O76A               | 143.1(3) |
| O5-Ce2-O34  | 122.4(2) | O56-Ce6-O69 | 68.9(3)  | O77-Ce12-O78A               | 102.6(6) |

|             |          |             |          |                |          |
|-------------|----------|-------------|----------|----------------|----------|
| O4-Ce2-O34  | 68.5(2)  | O54-Ce6-O69 | 69.6(3)  | O32-Ce12-O78A  | 127.5(3) |
| O8-Ce2-O34  | 76.4(3)  | O70-Ce7-O16 | 142.3(3) | O78-Ce12-O78A  | 67.0(4)  |
| O1-Ce2-O34  | 130.8(2) | O70-Ce7-O4  | 128.9(3) | O35-Ce12-O78A  | 139.2(4) |
| O27-Ce2-O34 | 154.3(2) | O16-Ce7-O4  | 66.4(2)  | O76A-Ce12-O78A | 49.1(3)  |
| O33-Ce2-O34 | 57.9(2)  | O70-Ce7-O13 | 143.0(3) | O77-Ce12-O77'  | 147.3(7) |
| O2-Ce2-O29  | 127.5(3) | O16-Ce7-O13 | 73.0(3)  | O32-Ce12-O77'  | 125.7(6) |
| O5-Ce2-O29  | 122.6(2) | O4-Ce7-O13  | 65.4(2)  | O78-Ce12-O77'  | 53.5(6)  |
| O4-Ce2-O29  | 67.3(2)  | O70-Ce7-O36 | 76.3(3)  | O12-Mn1-O10    | 87.0(3)  |
| O8-Ce2-O29  | 75.4(2)  | O16-Ce7-O36 | 133.4(3) | O12-Mn1-O11    | 88.3(4)  |
| O1-Ce2-O29  | 76.7(2)  | O4-Ce7-O36  | 67.5(2)  | O10-Mn1-O11    | 85.7(4)  |
| O27-Ce2-O29 | 57.7(2)  | O13-Ce7-O36 | 81.6(3)  | O12-Mn1-O47    | 95.3(3)  |
| O33-Ce2-O29 | 150.9(2) | O70-Ce7-O34 | 74.4(3)  | O10-Mn1-O47    | 177.6(4) |
| O34-Ce2-O29 | 114.6(2) | O16-Ce7-O34 | 83.0(3)  | O11-Mn1-O47    | 93.7(4)  |
| O3-Ce3-O2   | 72.0(3)  | O4-Ce7-O34  | 69.6(2)  | O12-Mn1-O45    | 95.2(4)  |
| O3-Ce3-O4   | 140.4(3) | O13-Ce7-O34 | 134.4(3) | O10-Mn1-O45    | 93.4(4)  |
| O2-Ce3-O4   | 72.4(2)  | O36-Ce7-O34 | 88.0(3)  | O11-Mn1-O45    | 176.3(4) |
| O3-Ce3-O7   | 109.9(4) | O70-Ce7-O15 | 112.3(3) | O47-Mn1-O45    | 87.1(4)  |
| O2-Ce3-O7   | 152.0(4) | O16-Ce7-O15 | 66.3(2)  | O12-Mn1-O39    | 174.9(4) |
| O4-Ce3-O7   | 109.7(4) | O4-Ce7-O15  | 118.7(3) | O10-Mn1-O39    | 88.6(4)  |
| O3-Ce3-O1   | 72.7(2)  | O13-Ce7-O15 | 65.2(3)  | O11-Mn1-O39    | 88.7(4)  |
| O2-Ce3-O1   | 60.5(3)  | O36-Ce7-O15 | 134.7(3) | O47-Mn1-O39    | 89.1(4)  |
| O4-Ce3-O1   | 74.9(2)  | O34-Ce7-O15 | 137.2(2) | O45-Mn1-O39    | 87.7(4)  |
| O7-Ce3-O1   | 147.4(4) | O70-Ce7-O57 | 71.5(3)  | O9-Mn2-O11     | 87.9(4)  |
| O3-Ce3-O36  | 121.1(3) | O16-Ce7-O57 | 73.5(3)  | O9-Mn2-O10     | 88.0(4)  |
| O2-Ce3-O36  | 78.6(3)  | O4-Ce7-O57  | 128.1(2) | O11-Mn2-O10    | 86.2(4)  |
| O4-Ce3-O36  | 67.2(2)  | O13-Ce7-O57 | 131.1(3) | O9-Mn2-O41     | 95.4(4)  |
| O7-Ce3-O36  | 77.0(4)  | O36-Ce7-O57 | 146.3(3) | O11-Mn2-O41    | 176.7(4) |
| O1-Ce3-O36  | 130.9(2) | O34-Ce7-O57 | 74.1(3)  | O10-Mn2-O41    | 94.5(4)  |
| O3-Ce3-O38  | 67.6(2)  | O15-Ce7-O57 | 69.1(3)  | O9-Mn2-O80     | 95.6(4)  |
| O2-Ce3-O38  | 80.9(3)  | O70-Ce7-O49 | 71.3(3)  | O11-Mn2-O80    | 92.3(5)  |
| O4-Ce3-O38  | 122.6(3) | O16-Ce7-O49 | 132.5(3) | O10-Mn2-O80    | 176.1(4) |
| O7-Ce3-O38  | 74.7(4)  | O4-Ce7-O49  | 125.9(3) | O41-Mn2-O80    | 86.7(5)  |
| O1-Ce3-O38  | 131.3(3) | O13-Ce7-O49 | 74.0(3)  | O9-Mn2-O40     | 175.5(4) |
| O36-Ce3-O38 | 58.1(2)  | O36-Ce7-O49 | 72.7(3)  | O11-Mn2-O40    | 88.6(4)  |
| O3-Ce3-O26  | 124.1(3) | O34-Ce7-O49 | 143.6(3) | O10-Mn2-O40    | 89.0(4)  |
| O2-Ce3-O26  | 126.1(3) | O15-Ce7-O49 | 69.2(3)  | O41-Mn2-O40    | 88.2(4)  |
| O4-Ce3-O26  | 67.1(3)  | O57-Ce7-O49 | 105.3(3) | O80-Mn2-O40    | 87.4(5)  |
| O7-Ce3-O26  | 77.2(4)  | O20-Ce8-O5  | 66.7(2)  | O13-Mn3-O14    | 87.5(4)  |
| O1-Ce3-O26  | 75.4(3)  | O20-Ce8-O19 | 65.7(2)  | O13-Mn3-O15    | 88.1(4)  |
| O36-Ce3-O26 | 114.5(3) | O5-Ce8-O19  | 119.3(2) | O14-Mn3-O15    | 87.5(4)  |
| O38-Ce3-O26 | 151.9(3) | O20-Ce8-O17 | 74.7(2)  | O13-Mn3-O55    | 96.4(5)  |
| O3-Ce3-O24  | 69.1(3)  | O5-Ce8-O17  | 66.8(2)  | O14-Mn3-O55    | 93.6(5)  |
| O2-Ce3-O24  | 126.6(3) | O19-Ce8-O17 | 66.0(2)  | O15-Mn3-O55    | 175.4(4) |
| O4-Ce3-O24  | 122.1(3) | O20-Ce8-O33 | 135.9(2) | O13-Mn3-O50    | 93.7(4)  |
| O7-Ce3-O24  | 77.1(4)  | O5-Ce8-O33  | 69.6(2)  | O14-Mn3-O50    | 178.7(4) |
| O1-Ce3-O24  | 73.8(2)  | O19-Ce8-O33 | 136.6(2) | O15-Mn3-O50    | 92.2(5)  |
| O36-Ce3-O24 | 154.1(3) | O17-Ce8-O33 | 83.2(2)  | O55-Mn3-O50    | 86.6(5)  |
| O38-Ce3-O24 | 114.7(3) | O20-Ce8-O30 | 86.2(2)  | O13-Mn3-O51    | 174.9(4) |
| O26-Ce3-O24 | 58.5(3)  | O5-Ce8-O30  | 67.6(2)  | O14-Mn3-O51    | 87.9(4)  |
| O9-Ce4-O21  | 134.4(3) | O19-Ce8-O30 | 140.7(2) | O15-Mn3-O51    | 89.3(4)  |
| O9-Ce4-O11  | 65.8(3)  | O17-Ce8-O30 | 134.4(2) | O55-Mn3-O51    | 86.2(5)  |
| O21-Ce4-O11 | 132.1(3) | O33-Ce8-O30 | 82.7(2)  | O50-Mn3-O51    | 90.9(4)  |
| O9-Ce4-O67  | 141.6(3) | O20-Ce8-O62 | 73.9(3)  | O16-Mn4-O14    | 87.5(4)  |
| O21-Ce4-O67 | 76.7(3)  | O5-Ce8-O62  | 126.5(2) | O16-Mn4-O15    | 89.0(3)  |
| O11-Ce4-O67 | 113.5(3) | O19-Ce8-O62 | 71.0(3)  | O14-Mn4-O15    | 86.5(4)  |
| O9-Ce4-O3   | 67.5(3)  | O17-Ce8-O62 | 134.1(3) | O16-Mn4-O53    | 94.4(3)  |
| O21-Ce4-O3  | 68.0(2)  | O33-Ce8-O62 | 141.7(3) | O14-Mn4-O53    | 91.6(4)  |
| O11-Ce4-O3  | 118.8(3) | O30-Ce8-O62 | 75.3(3)  | O15-Mn4-O53    | 176.0(3) |
| O67-Ce4-O3  | 127.7(3) | O20-Ce8-O43 | 132.0(2) | O16-Mn4-O58    | 94.8(4)  |
| O9-Ce4-O12  | 74.0(3)  | O5-Ce8-O43  | 127.3(2) | O14-Mn4-O58    | 177.3(3) |

|             |          |             |          |             |          |
|-------------|----------|-------------|----------|-------------|----------|
| O21-Ce4-O12 | 79.0(3)  | O19-Ce8-O43 | 69.1(3)  | O15-Mn4-O58 | 92.2(4)  |
| O11-Ce4-O12 | 65.7(3)  | O17-Ce8-O43 | 72.9(2)  | O53-Mn4-O58 | 89.5(4)  |
| O67-Ce4-O12 | 143.1(3) | O33-Ce8-O43 | 73.2(2)  | O16-Mn4-O52 | 175.6(4) |
| O3-Ce4-O12  | 65.1(2)  | O30-Ce8-O43 | 141.2(2) | O14-Mn4-O52 | 89.1(4)  |
| O9-Ce4-O24  | 83.2(3)  | O62-Ce8-O43 | 105.8(3) | O15-Mn4-O52 | 88.0(3)  |
| O21-Ce4-O24 | 89.5(3)  | O20-Ce8-O71 | 142.2(3) | O53-Mn4-O52 | 88.5(4)  |
| O11-Ce4-O24 | 138.2(3) | O5-Ce8-O71  | 131.2(3) | O58-Mn4-O52 | 88.5(4)  |
| O67-Ce4-O24 | 74.1(3)  | O19-Ce8-O71 | 109.5(3) | O17-Mn5-O19 | 88.9(3)  |
| O3-Ce4-O24  | 68.4(3)  | O17-Ce8-O71 | 140.1(3) | O17-Mn5-O18 | 88.6(3)  |
| O12-Ce4-O24 | 133.1(3) | O33-Ce8-O71 | 74.9(3)  | O19-Mn5-O18 | 86.4(3)  |
| O9-Ce4-O48  | 131.3(3) | O30-Ce8-O71 | 75.7(3)  | O17-Mn5-O79 | 95.5(3)  |
| O21-Ce4-O48 | 72.4(3)  | O62-Ce8-O71 | 69.5(3)  | O19-Mn5-O79 | 93.4(3)  |
| O11-Ce4-O48 | 67.8(3)  | O43-Ce8-O71 | 69.0(3)  | O18-Mn5-O79 | 175.9(3) |
| O67-Ce4-O48 | 72.0(3)  | O72-Ce9-O23 | 76.7(3)  | O17-Mn5-O63 | 95.6(3)  |
| O3-Ce4-O48  | 127.3(3) | O72-Ce9-O17 | 142.1(3) | O19-Mn5-O63 | 174.9(3) |
| O12-Ce4-O48 | 74.4(3)  | O23-Ce9-O17 | 132.0(2) | O18-Mn5-O63 | 91.2(4)  |
| O24-Ce4-O48 | 144.4(3) | O72-Ce9-O18 | 115.3(3) | O79-Mn5-O63 | 88.6(4)  |
| O9-Ce4-O44  | 74.2(3)  | O23-Ce9-O18 | 134.1(3) | O17-Mn5-O59 | 175.9(4) |
| O21-Ce4-O44 | 146.3(3) | O17-Ce9-O18 | 65.9(2)  | O19-Mn5-O59 | 88.3(4)  |
| O11-Ce4-O44 | 70.2(3)  | O72-Ce9-O20 | 143.4(3) | O18-Mn5-O59 | 88.3(4)  |
| O67-Ce4-O44 | 70.3(3)  | O23-Ce9-O20 | 79.1(2)  | O79-Mn5-O59 | 87.7(4)  |
| O3-Ce4-O44  | 129.1(3) | O17-Ce9-O20 | 73.8(2)  | O63-Mn5-O59 | 87.1(4)  |
| O12-Ce4-O44 | 133.1(3) | O18-Ce9-O20 | 65.8(2)  | O20-Mn6-O19 | 87.8(3)  |
| O24-Ce4-O44 | 75.1(3)  | O72-Ce9-O5  | 126.1(3) | O20-Mn6-O18 | 88.6(3)  |
| O48-Ce4-O44 | 103.1(3) | O23-Ce9-O5  | 66.5(2)  | O19-Mn6-O18 | 86.8(3)  |
| O12-Ce5-O10 | 66.0(3)  | O17-Ce9-O5  | 66.4(2)  | O20-Mn6-O61 | 94.5(3)  |
| O12-Ce5-O3  | 66.6(2)  | O18-Ce9-O5  | 118.5(2) | O19-Mn6-O61 | 92.6(3)  |
| O10-Ce5-O3  | 119.4(3) | O20-Ce9-O5  | 65.4(2)  | O18-Mn6-O61 | 176.8(4) |
| O12-Ce5-O38 | 134.1(3) | O72-Ce9-O27 | 75.0(3)  | O20-Mn6-O65 | 94.7(3)  |
| O10-Ce5-O38 | 135.6(3) | O23-Ce9-O27 | 90.3(2)  | O19-Mn6-O65 | 177.4(3) |
| O3-Ce5-O38  | 68.2(2)  | O17-Ce9-O27 | 80.1(2)  | O18-Mn6-O65 | 92.7(3)  |
| O12-Ce5-O9  | 74.4(3)  | O18-Ce9-O27 | 135.2(3) | O61-Mn6-O65 | 87.7(4)  |
| O10-Ce5-O9  | 65.5(3)  | O20-Ce9-O27 | 132.2(2) | O20-Mn6-O60 | 175.4(4) |
| O3-Ce5-O9   | 67.2(3)  | O5-Ce9-O27  | 67.6(2)  | O19-Mn6-O60 | 89.1(4)  |
| O38-Ce5-O9  | 81.8(3)  | O72-Ce9-O66 | 72.5(3)  | O18-Mn6-O60 | 87.7(4)  |
| O12-Ce5-O31 | 84.3(3)  | O23-Ce9-O66 | 73.7(3)  | O61-Mn6-O60 | 89.1(4)  |
| O10-Ce5-O31 | 138.9(3) | O17-Ce9-O66 | 132.5(3) | O65-Mn6-O60 | 88.3(4)  |

<sup>a</sup>Symmetry transformations used to generate equivalent atoms: A:  $-x + 1/2, -y + 3/2, -z$

**Table S3.** Bond valence Sum Analysis for the Mn, Ce and O Atoms of Complexes **1** and **2**

| Complex  | atom | BVSs  | assigned O.S. | atom  | BVSs             | assigned group   |
|----------|------|-------|---------------|-------|------------------|------------------|
| <b>1</b> | Mn1  | 4.393 | 4             | O1    | 1.680            | OH <sup>-</sup>  |
|          | Mn2  | 4.402 | 4             | O2    | 2.440            | O <sup>2-</sup>  |
|          | Ce1  | 4.213 | 4             | O3    | 1.352            | OH <sup>-</sup>  |
| <b>2</b> | Mn1  | 4.353 | 4             | O1    | 1.503            | O <sup>2-</sup>  |
|          | Mn2  | 4.395 | 4             | O2    | 2.145            | O <sup>2-</sup>  |
|          | Mn3  | 4.424 | 4             | O3    | 2.495            | O <sup>2-</sup>  |
|          | Mn4  | 4.227 | 4             | O4    | 2.479            | O <sup>2-</sup>  |
|          | Mn5  | 4.398 | 4             | O5    | 2.487            | O <sup>2-</sup>  |
|          | Mn6  | 4.455 | 4             | O6    | 0.597            | OH <sup>-</sup>  |
|          | Ce1  | 4.624 | 4             | O7    | 0.582            | OH <sup>-</sup>  |
|          | Ce2  | 4.568 | 4             | O8    | 0.573            | OH <sup>-</sup>  |
|          | Ce3  | 4.691 | 4             | O9    | 2.065            | O <sup>2-</sup>  |
|          | Ce4  | 4.633 | 4             | O10   | 2.167            | O <sup>2-</sup>  |
|          | Ce5  | 4.630 | 4             | O11   | 2.129            | O <sup>2-</sup>  |
|          | Ce6  | 4.755 | 4             | O12   | 2.071            | O <sup>2-</sup>  |
|          | Ce7  | 4.678 | 4             | O13   | 2.132            | O <sup>2-</sup>  |
|          | Ce8  | 4.563 | 4             | O14   | 2.104            | O <sup>2-</sup>  |
|          | Ce9  | 4.616 | 4             | O15   | 2.021            | O <sup>2-</sup>  |
|          |      |       |               | O16   | 2.082            | O <sup>2-</sup>  |
|          |      |       |               | O17   | 2.011            | O <sup>2-</sup>  |
|          |      |       |               | O18   | 2.115            | O <sup>2-</sup>  |
|          |      |       |               | O19   | 2.195            | O <sup>2-</sup>  |
|          |      |       |               | O20   | 2.065            | O <sup>2-</sup>  |
|          |      |       |               | O67   | 0.344            | H <sub>2</sub> O |
|          |      |       | O68           | 0.398 | H <sub>2</sub> O |                  |
|          |      |       | O69           | 0.410 | H <sub>2</sub> O |                  |
|          |      |       | O70           | 0.507 | H <sub>2</sub> O |                  |
|          |      |       | O71           | 0.377 | H <sub>2</sub> O |                  |

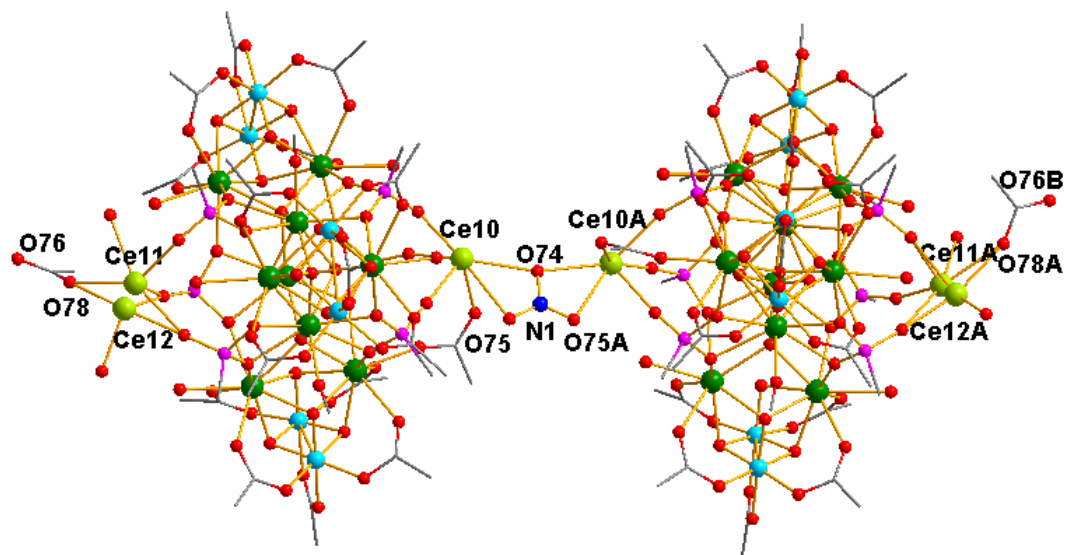

**Fig. S1.** The repeating unit of **2**. Color code: Mn: azury; Ce<sup>IV</sup>: green; Ce<sup>III</sup>: light green; P: purple; O: red; N: blue; C: gray. Hydrogen atoms have been omitted for clarity. Symmetry code: A:  $-x + 1/2, -y + 3/2, -z$ ; B:  $-x, y, -z + 1/2$ .

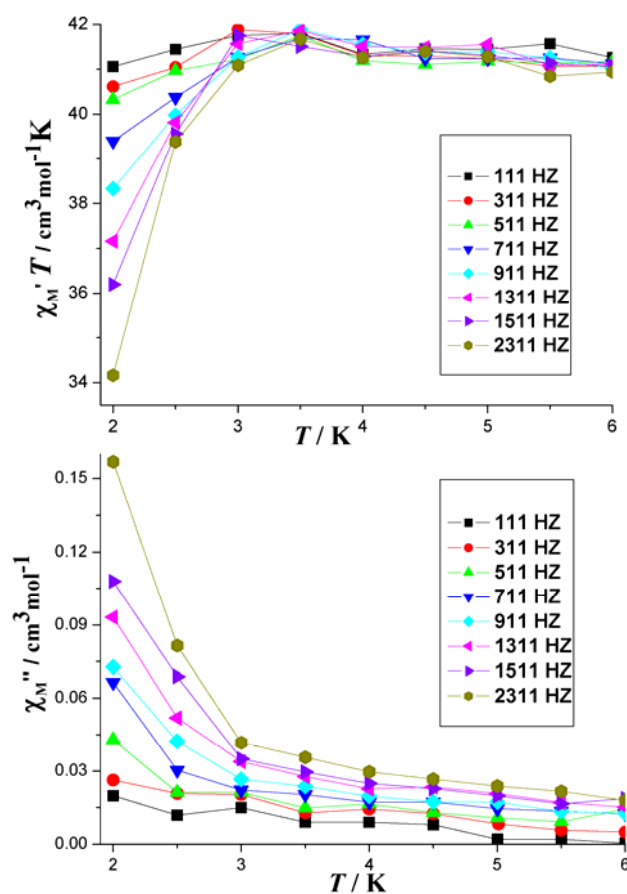

**Fig. S2** In-phase ( $\chi'_M T$ ) (top) and out-phase ( $\chi''_M$ ) (bottom) AC susceptibility versus  $T$  for complex **1** measured in a 3.0 G AC field oscillating at the indicated frequencies.

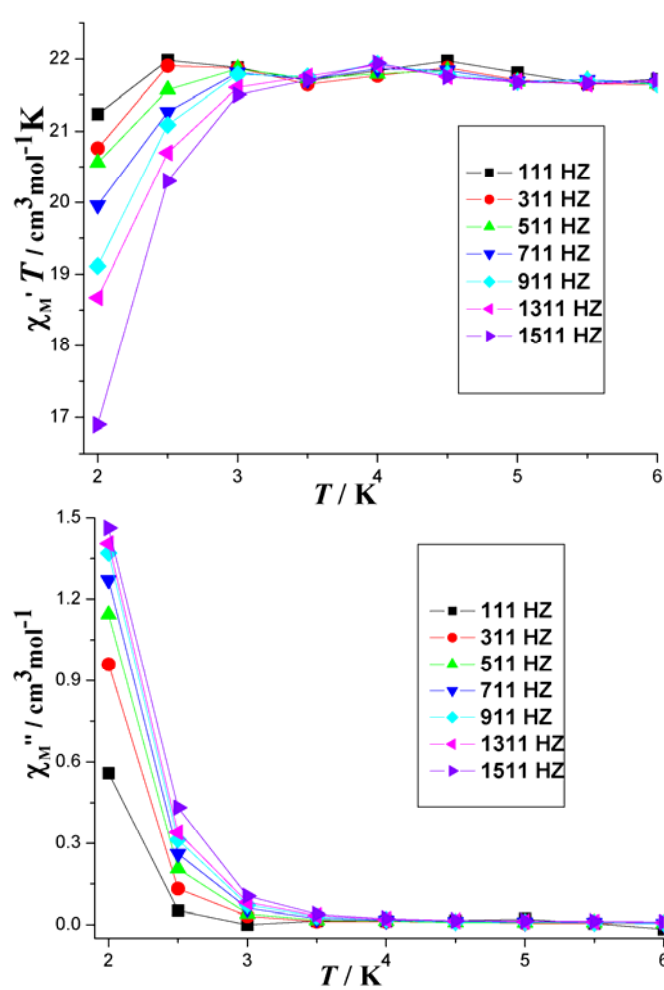

**Fig. S3** In-phase ( $\chi'_M T$ ) (top) and out-phase ( $\chi''_M$ ) (bottom) AC susceptibility versus  $T$  for complex **2** measured in a 3.0 G AC field oscillating at the indicated frequencies.
